# Supplementary material
Source: MDPI journal article supplement (https://www.mdpi.com/2037-0164/14/2/31)
Supplement: s1 [file s1]

Article

# Novel Sources of Resistance to *Stagonospora nodorum* and Role of Effector-Susceptibility Gene Interactions in Wheat of Russian Breeding

Tatyana Nuzhnaya <sup>1,2\*</sup>, Svetlana Veselova <sup>1</sup>, Guzel Burkhanova <sup>1</sup>, Sergey Rumyantsev <sup>1</sup>, Olesya Shoeva <sup>3</sup>, Mikhail Shein <sup>1</sup> and Igor Maksimov <sup>1</sup>

<sup>1</sup> Institute of Biochemistry and Genetics, Ufa Federal Research Centre, Russian Academy of Sciences, Prospekt Oktyabrya, 71, 450054 Ufa, Russia; veselova75@rambler.ru (S.V.); guzel\_mur@mail.ru (G.B.); rumyantsev-serg@mail.ru (S.R.); olesya\_ter@bionet.nsc.ru (O.Sh.); mikeshenoda@yandex.ru (M.Sh.); igor.mak2011@yandex.ru (I.M.)

<sup>2</sup> Ufa Institute of Biology, Ufa Federal Research Centre, Russian Academy of Sciences, Prospekt Oktyabrya, 69, 450054 Ufa, Russia

<sup>3</sup> Federal Research Center Institute of Cytology and Genetics, Siberian Branch of Russian Academy of Sciences, Ac. Lavrentieva Ave., 10, 630090 Novosibirsk, Russia

\* Correspondence: tanyawww89@mail.ru; Tel.: +7-9173749644

**Supplementary Table S1.** Primers used to identify pathogen effector genes and plant susceptibility genes from genomic DNA.

| Genes              | Strand  | 5' to 3' Primer Sequences | GenBank accession number |
|--------------------|---------|---------------------------|--------------------------|
| <i>TaTsn1-2</i>    | Forward | CTCTTTGCCGGAGAGCATAC      | GU259657.1               |
|                    | Reverse | TCGAATCCTCAAAGCCTACC      |                          |
| <i>TaSnn1</i>      | Forward | TGCGCCAACTCAACACATAC      | KP085710                 |
|                    | Reverse | GCCAATGGCACCCACAGC        |                          |
| <i>Xcfd20</i>      | Forward | TGATGGGAAGGTAATGGGAG      | -                        |
|                    | Reverse | ATCCAGTTCTCGTCCAAAGC      |                          |
| <i>Xgwm234</i>     | Forward | GAGTCCTGATGTGAAGCTGTTG    | -                        |
|                    | Reverse | CTCATTGGGGTGTGTACGTG      |                          |
| <i>SnToxA</i>      | Forward | AACGCCAATACAGTGCGAGT      | JX997419                 |
|                    | Reverse | GCTGCATTCTCCAATTTTCACG    |                          |
| <i>SnTox1</i>      | Forward | GTACTCCCGTACGTACTCTTCT    | JX997402                 |
|                    | Reverse | CGCTTGTTTGCCGTTCTTAC      |                          |
| <i>SnTox3</i>      | Forward | CGAGCTGATATCCCGTTTGA      | FJ823644                 |
|                    | Reverse | GGGACAGTGACAATAGGTAAGG    |                          |
| <i>Snβ-tubulin</i> | Forward | ACACCAGGAACAACGCTAACAGC   | S56922                   |
|                    | Reverse | TATGCGCGCGTGCTGCAAATTCGA  |                          |

Supplementary Table S2. PCR primers used for qRT-PCR analysis.

21

22

23

24

25

26

27

| Genes           | Strand  | 5' to 3' Primer Sequences | GenBank accession number |
|-----------------|---------|---------------------------|--------------------------|
| <i>TaTsn1-1</i> | Forward | CCTGATTGGCTTCTGGGTATTA    | GU259657.1               |
|                 | Reverse | GTGGTAGGTTCTTGCACTTAGA    |                          |
| <i>TaSnn1</i>   | Forward | CCTATGCTGGTCTACGAGTTTATC  | KP085710                 |
|                 | Reverse | TTGAGGGCCACCTTGTTATT      |                          |
| <i>TaRLI</i>    | Forward | TTGAGCAACTCATGGACCAG      | AY059462                 |
|                 | Reverse | GCTTTCCAAGGCACAAACAT      |                          |

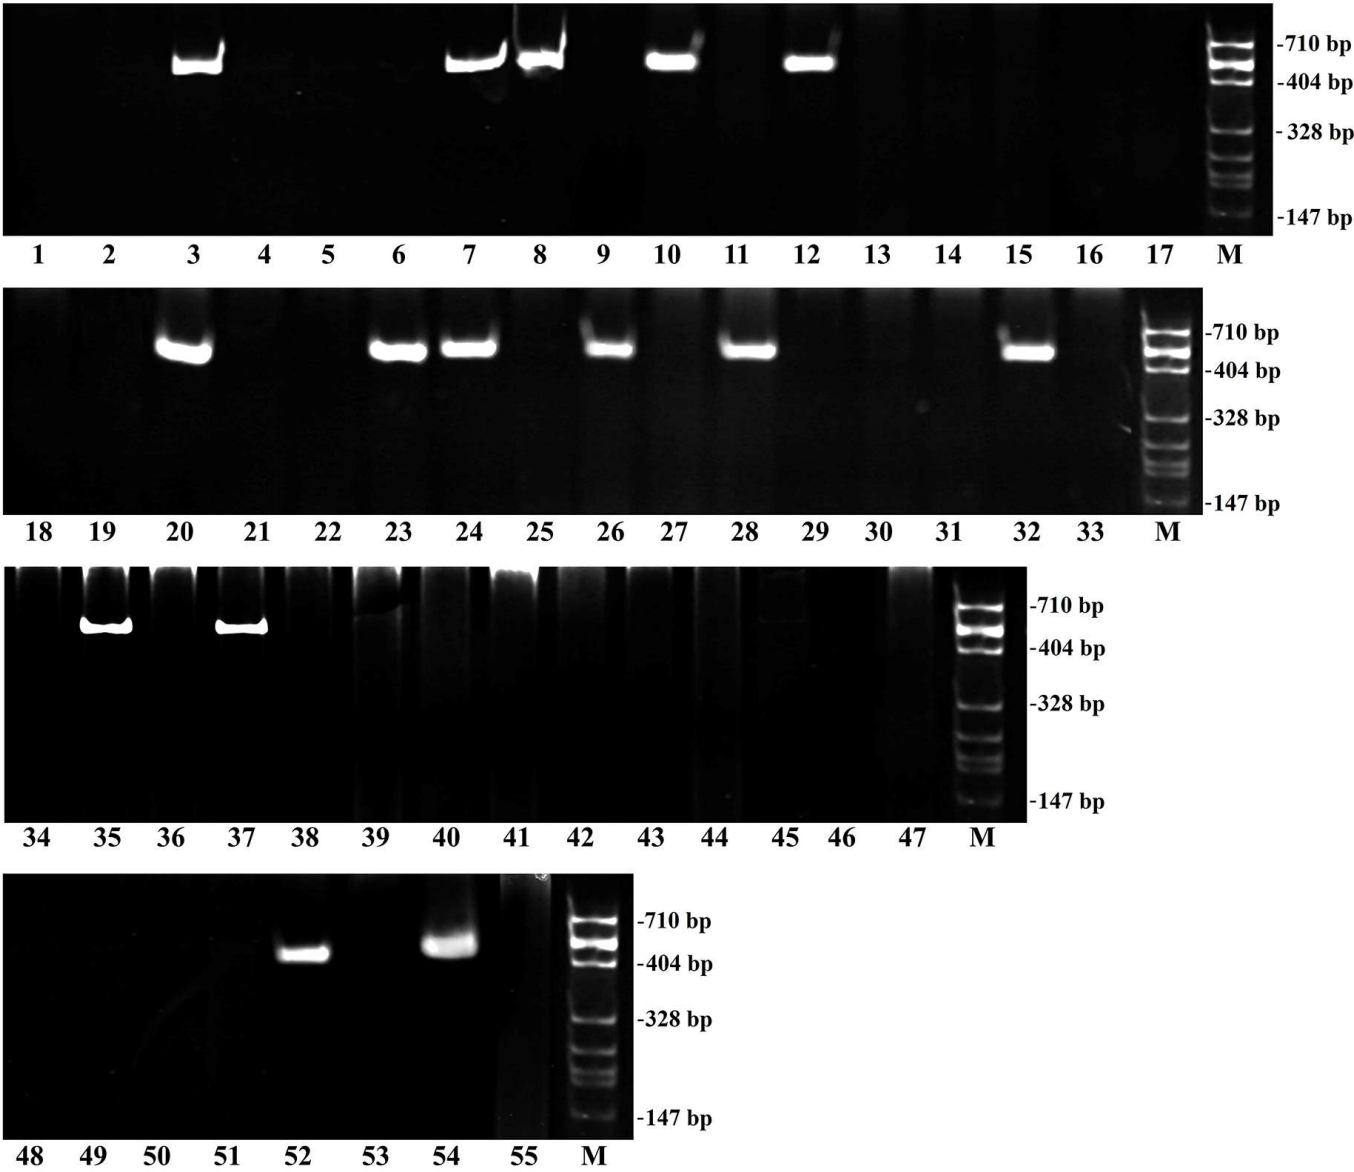

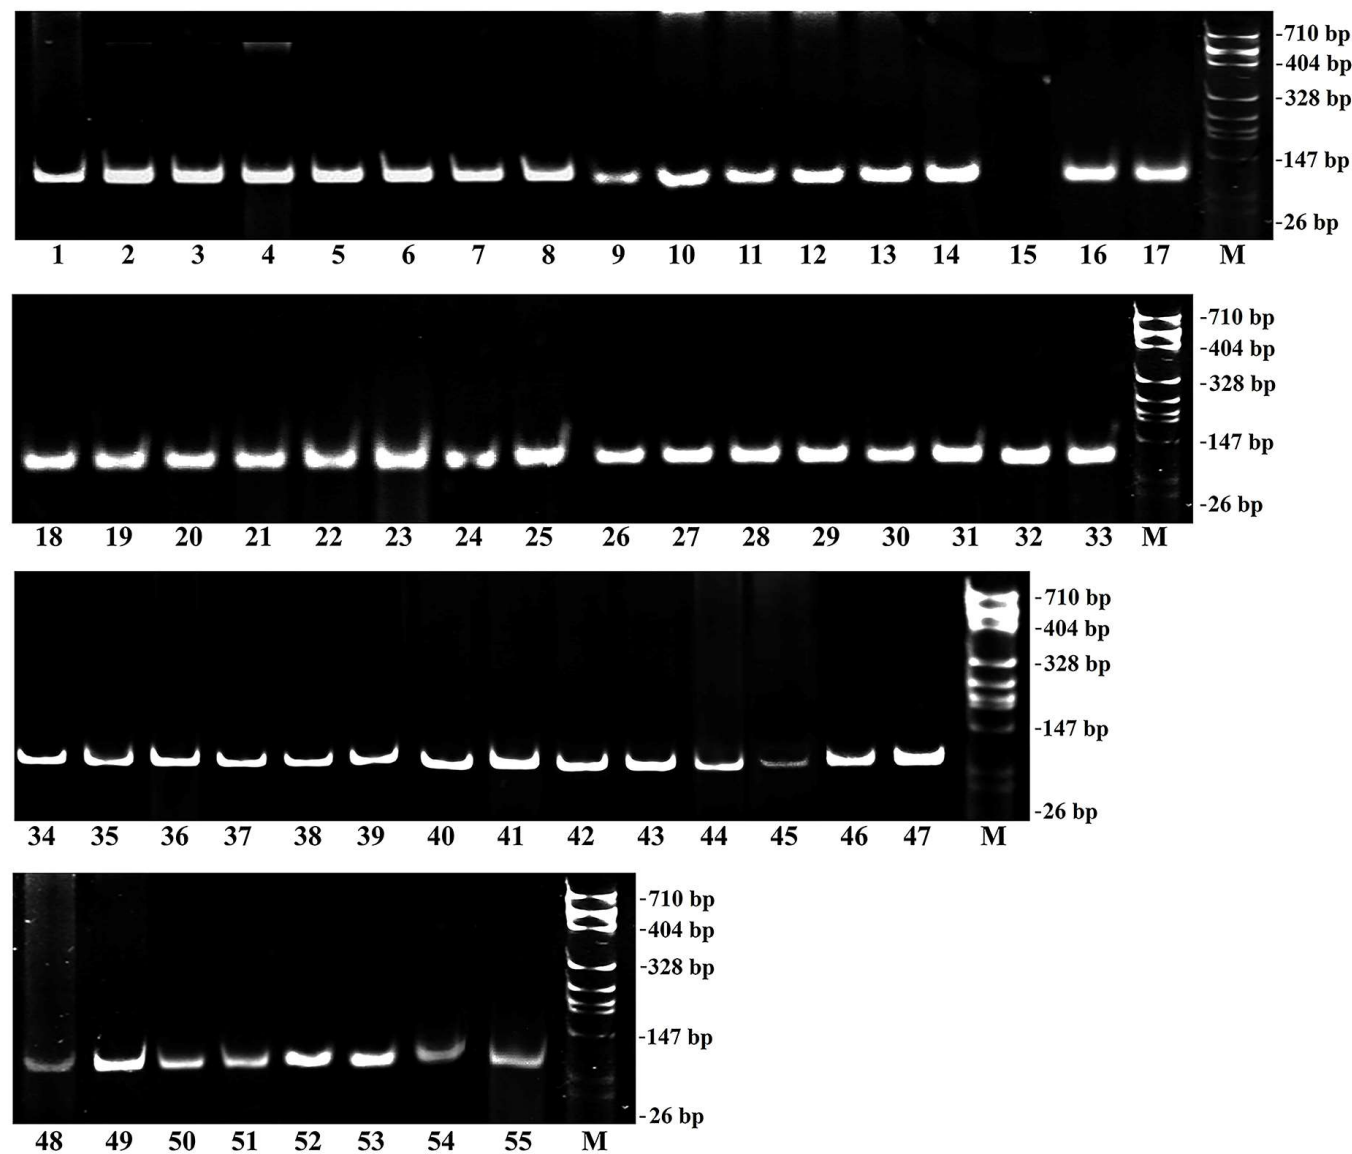

**Supplementary Figure S2.** Identification of alleles of *Snn1* gene in 55 wheat accessions by PCR. Amplified fragments with sizes of 80 bp were separated in a polyacrylamide gel. Numbers from 1 to 55 wheat accessions correspond to the numbers in Table S3. M - DNA markers. Marker sizes are indicated on the right. The presence of the amplification product indicates the existence of a dominant allele of the *Snn1* gene; the absence of the amplification product indicates a null (recessive) *smn1* allele.

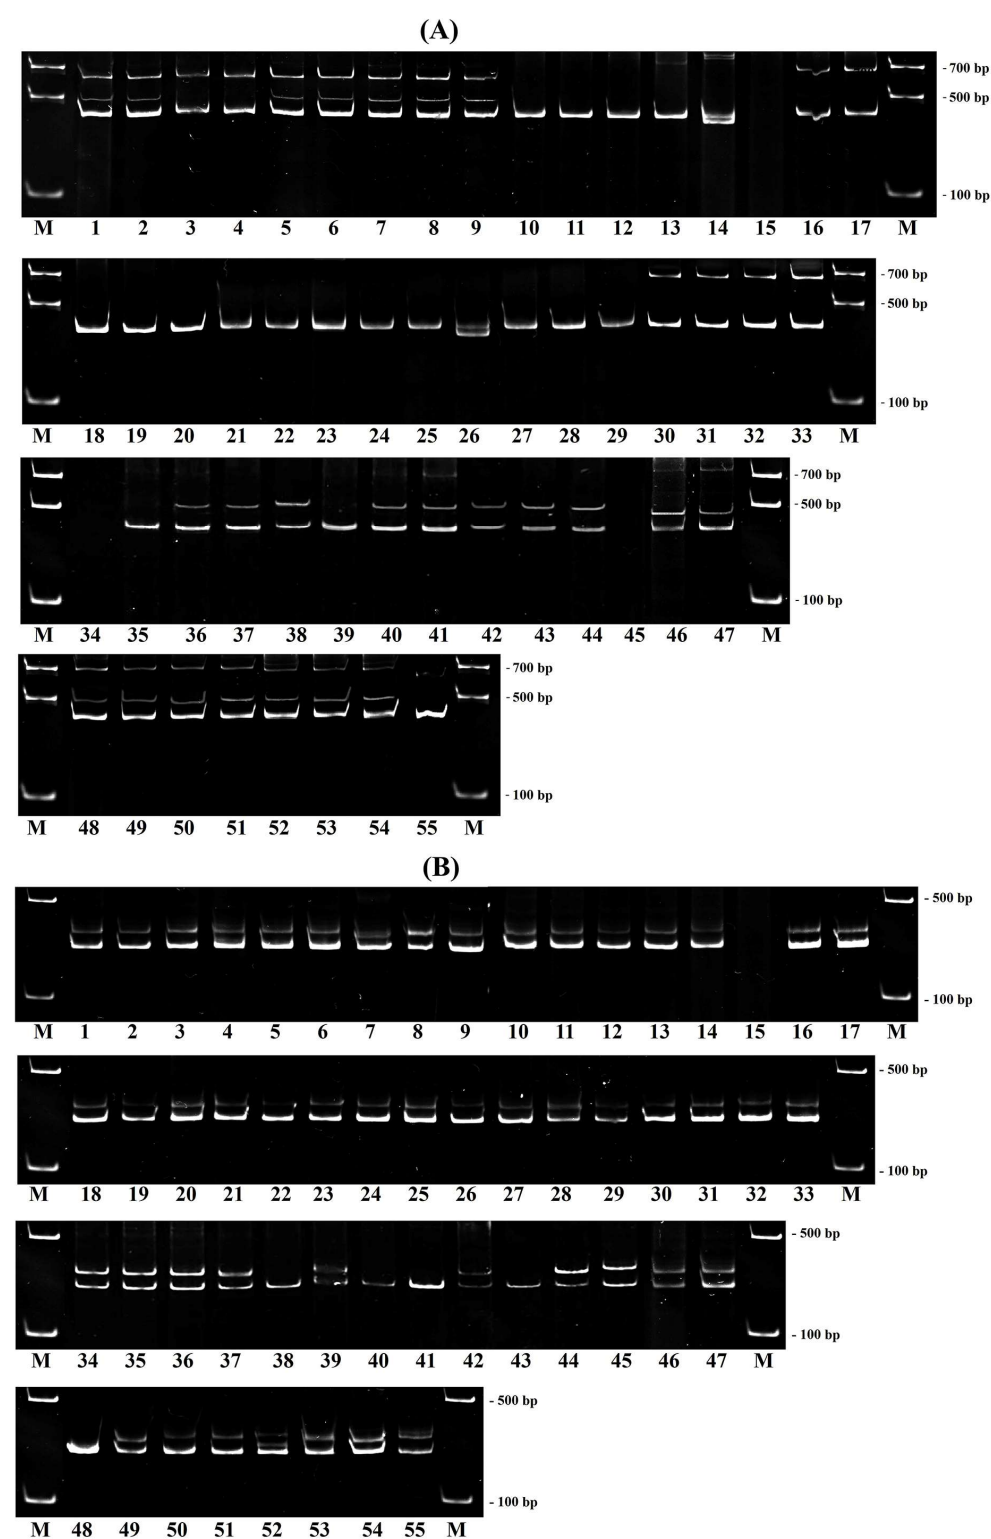

**Supplementary Figure S3.** Identification of alleles of the *Snn3-B1* locus in 55 wheat samples using primers to SSR markers *Xcfd20* (A) and *Xgwm234* (B) by PCR. The results show that marker *Xcfd20* amplifies different fragments in wheat (370 bp, 380 bp, 500 bp, about 700 bp), marker *Xgwm234* amplifies two fragments in wheat with sizes of 244 and 255 bp. Numbers from 1 to 55 wheat samples correspond to the numbers in Table S3. M - DNA markers. Marker sizes are indicated on the right. The absence of an amplification product indicates a null (recessive) *snn3-B1* allele.

**Supplementary Table S3.** The 55 *Triticum* accessions evaluated for the presence of the *Tsn1*, *Snn1* and *Snn3-B1* DNA sequence.

| Number of<br>Accession | Cultivar        | Type of<br>development | Source (origin)  | <i>Tsn1</i> | <i>Snn1</i> | <i>Snn3-B1</i> |                |
|------------------------|-----------------|------------------------|------------------|-------------|-------------|----------------|----------------|
|                        |                 |                        |                  | GU259657.1  | KP085710    | <i>Xcfd20</i>  | <i>Xgwm234</i> |
| 1                      | Afina           | winter                 | NGC* (Krasnodar) | -           | +           | +              | +              |
| 2                      | Bezostay 100    | winter                 | NGC (Krasnodar)  | -           | +           | +              | +              |
| 3                      | Esaul           | winter                 | NGC (Krasnodar)  | +           | +           | +              | +              |
| 4                      | Laureat         | winter                 | NGC (Krasnodar)  | -           | +           | +              | +              |
| 5                      | Sila            | winter                 | NGC (Krasnodar)  | -           | +           | +              | +              |
| 6                      | Tanya 1         | winter                 | NGC (Krasnodar)  | -           | +           | +              | +              |
| 7                      | Yubileynaya 100 | winter                 | NGC (Krasnodar)  | +           | +           | +              | +              |
| 8                      | Ermak           | winter                 | NGC (Krasnodar)  | +           | +           | +              | +              |
| 9                      | Etnos           | winter                 | NGC (Krasnodar)  | -           | +           | +              | +              |
| 10                     | Trio            | winter                 | NGC (Krasnodar)  | +           | +           | +              | +              |
| 11                     | Urup            | winter                 | NGC (Krasnodar)  | -           | +           | +              | +              |
| 12                     | Yuka            | winter                 | NGC (Krasnodar)  | +           | +           | +              | +              |
| 13                     | Asket           | winter                 | NGC (Krasnodar)  | -           | +           | +              | +              |
| 14                     | Gubernator Dona | winter                 | NGC (Krasnodar)  | -           | +           | +              | +              |
| 15                     | Don Mira        | winter                 | NGC (Krasnodar)  | -           | -           | -              | -              |
| 16                     | Tabor           | winter                 | NGC (Krasnodar)  | -           | +           | +              | +              |
| 17                     | Stan            | winter                 | NGC (Krasnodar)  | -           | +           | +              | +              |
| 18                     | Stanichnaya     | winter                 | NGC (Krasnodar)  | -           | +           | +              | +              |
| 19                     | Tanya           | winter                 | NGC (Krasnodar)  | -           | +           | +              | +              |
| 20                     | Alekseich       | winter                 | NGC (Krasnodar)  | +           | +           | +              | +              |
| 21                     | Bagrat          | winter                 | NGC (Krasnodar)  | -           | +           | +              | +              |
| 22                     | Antonina        | winter                 | NGC (Krasnodar)  | -           | +           | +              | +              |

|    |                   |        |                     |   |   |   |   |
|----|-------------------|--------|---------------------|---|---|---|---|
| 23 | Grom              | winter | NGC (Krasnodar)     | + | + | + | + |
| 24 | Vassa             | winter | NGC (Krasnodar)     | + | + | + | + |
| 25 | Brigada           | winter | NGC (Krasnodar)     | - | + | + | + |
| 26 | Dmitriy           | winter | NGC (Krasnodar)     | + | + | + | + |
| 27 | Gurt              | winter | NGC (Krasnodar)     | - | + | + | + |
| 28 | Gratsiya          | winter | NGC (Krasnodar)     | + | + | + | + |
| 29 | Zhiva             | winter | NGC (Krasnodar)     | - | + | + | + |
| 30 | Yeremeyavna       | winter | NGC (Krasnodar)     | - | + | + | + |
| 31 | Lebed             | winter | NGC (Krasnodar)     | - | + | + | + |
| 32 | Kalym             | winter | NGC (Krasnodar)     | + | + | + | + |
| 33 | Kuren             | winter | NGC (Krasnodar)     | - | + | + | + |
| 34 | Bashkirskaya 26   | spring | IBG UFRC RAS (RB)** | - | + | - | + |
| 35 | Zhnitsa           | spring | IBG UFRC RAS (RB)   | + | + | + | + |
| 36 | Kazahstanskaya 10 | spring | IBG UFRC RAS (RB)   | - | + | + | + |
| 37 | Iren              | spring | IBG UFRC RAS (RB)   | + | + | + | + |
| 38 | Omskaya 35        | spring | IBG UFRC RAS (RB)   | - | + | + | + |
| 39 | Vatan             | spring | IBG UFRC RAS (RB)   | - | + | + | + |
| 40 | Salavat Yulaev    | spring | IBG UFRC RAS (RB)   | - | + | + | + |
| 41 | Bashkirskaya 28   | spring | IBG UFRC RAS (RB)   | - | + | + | + |
| 42 | Tulajkovskaya 108 | spring | IBG UFRC RAS (RB)   | - | + | + | + |
| 43 | Ekada 113         | spring | IBG UFRC RAS (RB)   | - | + | + | + |
| 44 | Ekada 70          | spring | IBG UFRC RAS (RB)   | - | + | + | + |
| 45 | Boevchanka        | spring | IBG UFRC RAS (RB)   | - | + | - | + |
| 46 | Bashkirskaya 10   | winter | IBG UFRC RAS (RB)   | - | + | + | + |
| 47 | Bashkirskaya 11   | winter | IBG UFRC RAS (RB)   | - | + | + | + |
| 48 | Saratovskaya 29   | spring | IC&G SB RAS***      | - | + | + | + |
| 49 | Susquehanna       | winter | VWC (USA)****       | - | + | + | + |
| 50 | Mironovskaya 808  | winter | VWC (Ukraine)       | - | + | + | + |

|    |                |        |               |   |   |   |   |
|----|----------------|--------|---------------|---|---|---|---|
| 51 | Amelio         | winter | VWC (France)  | - | + | + | + |
| 52 | Selkirk        | spring | VWC (Canada)  | + | + | + | + |
| 53 | Atlas 66       | spring | VWC (USA)     | - | + | + | + |
| 54 | Salamoni       | spring | VWC (Lebanon) | + | + | + | + |
| 55 | Chinese Spring | spring | VWC (China)   | - | + | + | + |

Note: \*NGC - National Grain Center named after P.P. Lukyanenko (Krasnodar); \*\*IBG UFRC RAS (RB) - Institute of Biochemistry and Genetics Ufa Federal Research Centre of the Russian Academy of Sciences (Republic of Bashkortostan); \*\*\*IC&G SB RAS - Federal Research Center Institute of Cytology and Genetics, Siberian Branch of Russian Academy of Sciences; \*\*\*\*VWC (Vavilov wheat collection) – N.I. Vavilov Institute of Plant Genetic Resources in Russia. Plus (+) and minus (-) indicate presence and absence of the *Tsn1*, *Snn1* and *Snn3-B1* DNA sequence based on PCR assay.

**Supplementary Table S4.** The 55 *Triticum* accessions evaluated for reaction to SnTox3, SnToxA and SnTox1.

| Number of Accession | Cultivar        | Isolate of <i>S. nodorum</i> |                   |                         |                  |                |                  |
|---------------------|-----------------|------------------------------|-------------------|-------------------------|------------------|----------------|------------------|
|                     |                 | SnB(SnTox3/SnToxA)           |                   | Sn9MN-3A(SnTox3/SnToxA) |                  | Sn1SP (SnTox1) |                  |
|                     |                 | Damage zone, %               | Resistance group* | Damage zone, %          | Resistance group | Damage zone, % | Resistance group |
| 1                   | Afina           | 17 ± 1.5                     | M                 | 20 ± 2                  | M                | 45 ± 4         | S                |
| 2                   | Bezostay 100    | 18 ± 1.4                     | M                 | 34 ± 2.1                | S                | 52 ± 3.7       | S                |
| 3                   | Esaul           | 14 ± 0.9                     | R                 | 32 ± 2.6                | S                | 48 ± 4.3       | S                |
| 4                   | Laureat         | 13 ± 1.5                     | R                 | 47 ± 3.8                | S                | 42 ± 2.1       | S                |
| 5                   | Sila            | 31 ± 2.8                     | S                 | 63 ± 5.7                | S                | 25 ± 2         | M                |
| 6                   | Tanya 1         | 36 ± 2.9                     | S                 | 55 ± 4.4                | S                | 17 ± 1.4       | M                |
| 7                   | Yubileynaya 100 | 16 ± 1.1                     | M                 | 21 ± 1.9                | M                | 31 ± 2.5       | S                |
| 8                   | Ermak           | 35 ± 2.8                     | S                 | 42 ± 2.1                | S                | 38 ± 3.4       | S                |
| 9                   | Etnos           | 17 ± 1                       | M                 | 32 ± 2.6                | S                | 55 ± 3.9       | S                |
| 10                  | Trio            | 3 ± 0.3                      | RR                | 35 ± 3.2                | S                | 28 ± 1.1       | S                |
| 11                  | Urup            | 10 ± 0.9                     | R                 | 25 ± 2                  | M                | 36 ± 2.9       | S                |
| 12                  | Yuka            | n/d**                        | n/d               | n/d                     | n/d              | n/d            | n/d              |
| 13                  | Asket           | n/d                          | n/d               | n/d                     | n/d              | n/d            | n/d              |
| 14                  | Gubernator Dona | n/d                          | n/d               | n/d                     | n/d              | n/d            | n/d              |

|    |                   |            |     |          |     |          |     |
|----|-------------------|------------|-----|----------|-----|----------|-----|
| 15 | Don Mira          | 1.5 ± 0.05 | RR  | 2 ± 0.08 | RR  | 2 ± 0.2  | RR  |
| 16 | Tabor             | 1 ± 0.03   | RR  | 30 ± 2.7 | S   | 46 ± 3.7 | S   |
| 17 | Stan              | 5 ± 0.3    | RR  | 27 ± 1.6 | S   | 51 ± 4.6 | S   |
| 18 | Stanichnaya       | n/d        | n/d | n/d      | n/d | n/d      | n/d |
| 19 | Tanya             | 4 ± 0.5    | RR  | 36 ± 2.9 | S   | 53 ± 2.7 | S   |
| 20 | Alekseich         | 13 ± 1.2   | R   | 31 ± 1.9 | S   | 18 ± 1.6 | M   |
| 21 | Bagrat            | 15 ± 1.2   | R   | 38 ± 3.4 | S   | 36 ± 2.1 | S   |
| 22 | Antonina          | 3 ± 0.2    | RR  | 23 ± 1.4 | M   | 48 ± 2.4 | S   |
| 23 | Grom              | 5 ± 0.3    | RR  | 14 ± 0.9 | R   | 4 ± 0.3  | RR  |
| 24 | Vassa             | 4 ± 0.3    | RR  | 15 ± 1.2 | R   | 3 ± 0.3  | RR  |
| 25 | Brigada           | 13 ± 0.9   | RR  | 22 ± 1.3 | M   | 32 ± 2.6 | S   |
| 26 | Dmitriy           | 26 ± 2.1   | S   | 36 ± 3.3 | S   | 58 ± 4.1 | S   |
| 27 | Gurt              | 12 ± 0.6   | R   | 25 ± 2.1 | M   | 60 ± 4.8 | S   |
| 28 | Gratsiya          | 13 ± 1.1   | R   | 29 ± 2.7 | S   | 53 ± 3.2 | S   |
| 29 | Zhiva             | 2 ± 0.08   | RR  | 9 ± 0.5  | R   | 7 ± 0.2  | R   |
| 30 | Yeremeyavna       | 1 ± 0.1    | RR  | 15 ± 1.2 | R   | 5 ± 0.3  | RR  |
| 31 | Lebed             | 2 ± 0.15   | RR  | 15 ± 1.3 | R   | 3 ± 0.2  | RR  |
| 32 | Kalym             | 21 ± 1.7   | M   | 28 ± 2.5 | S   | 3 ± 0.1  | RR  |
| 33 | Kuren             | 2 ± 0.2    | RR  | 24 ± 1.7 | M   | 42 ± 3   | S   |
| 34 | Bashkirskaya 26   | 15 ± 1.4   | R   | 64 ± 5.1 | S   | 86 ± 5.2 | SS  |
| 35 | Zhnitsa           | 80 ± 5.6   | SS  | 85 ± 7.7 | SS  | 8 ± 0.6  | R   |
| 36 | Kazahstanskaya 10 | 52 ± 3.2   | S   | 54 ± 3.3 | S   | 14 ± 1.1 | R   |
| 37 | Iren              | 22 ± 0.9   | M   | 33 ± 2.7 | S   | 15 ± 1.2 | R   |
| 38 | Omskaya 35        | 4 ± 0.2    | RR  | 22 ± 1.3 | M   | 60 ± 5.4 | S   |
| 39 | Vatan             | 14 ± 1     | R   | 34 ± 2   | S   | 53 ± 3.2 | S   |
| 40 | Salavat Yulaev    | 15 ± 1.4   | R   | 35 ± 2.8 | S   | 46 ± 3.7 | S   |
| 41 | Bashkirskaya 28   | 15 ± 1.5   | R   | 41 ± 3.3 | S   | 52 ± 2.5 | S   |
| 42 | Tulajkovskaya 108 | 52 ± 4.2   | S   | 59 ± 4.2 | S   | 76 ± 6.1 | SS  |



|    |                  |           |    |          |    |          |    |
|----|------------------|-----------|----|----------|----|----------|----|
| 43 | Ekada 113        | 15 ± 1.2  | R  | 25 ± 2   | M  | 49 ± 3.9 | S  |
| 44 | Ekada 70         | 43 ± 2.6  | S  | 48 ± 3.4 | S  | 22 ± 1.1 | M  |
| 45 | Boevchanka       | 9 ± 0.5   | R  | 15 ± 1.4 | R  | 79 ± 3.9 | SS |
| 46 | Bashkirskaya 10  | 23 ± 1.9  | M  | 33 ± 2.7 | S  | 25 ± 1.8 | M  |
| 47 | Bashkirskaya 11  | 75 ± 3    | SS | 81 ± 6.5 | SS | 16 ± 1.3 | M  |
| 48 | Saratovskaya 29  | 15 ± 1.4  | R  | 22 ± 2   | M  | 4 ± 0.3  | RR |
| 49 | Susquehanna      | 30 ± 1.8  | S  | 51 ± 4.1 | S  | 3 ± 0.2  | RR |
| 50 | Mironovskaya 808 | 29 ± 1.5  | S  | 28 ± 1.9 | S  | 2 ± 0.1  | RR |
| 51 | Amelio           | 27 ± 1.62 | S  | 26 ± 1.8 | S  | 9 ± 0.5  | R  |
| 52 | Selkirk          | 30 ± 2.4  | S  | 20 ± 1.6 | M  | 8 ± 0.4  | R  |
| 53 | Atlas 66         | 32 ± 2.6  | S  | 34 ± 3.1 | S  | 3 ± 0.2  | RR |
| 54 | Salamoni         | 20 ± 1.4  | M  | 20 ± 1.7 | M  | 6 ± 0.6  | R  |
| 55 | Chinese Spring   | 15 ± 1.1  | R  | 23 ± 1.9 | M  | 52 ± 3.6 | S  |

Note: \*RR (0 - 5%) - varieties with very high and high resistance; R (6 - 15%) - resistant varieties; M (16 - 25%) - slightly susceptible varieties; S (26 - 65%) - susceptible varieties; SS (66 - 100%) - varieties with very high and high susceptibility; \*\*n/d – no data - these accessions were omitted from analysis due to poor growth or lack of seeds during different stages of the experiment.

**Supplementary Table S5.** Regression statistics for 32 wheat accessions that were resistant to one or two pathogen isolates.

| <i>Regression Statistics</i> |          |
|------------------------------|----------|
| Multiple R                   | 0,583423 |
| R Square                     | 0,340382 |
| Adjusted R                   |          |
| Square                       | 0,318395 |

|              |          |
|--------------|----------|
| Standard     |          |
| Error        | 12,95647 |
| Observations | 32       |

## ANOVA

|            | <i>df</i> | <i>SS</i> | <i>MS</i> | <i>F</i> | <i>Significance F</i> |
|------------|-----------|-----------|-----------|----------|-----------------------|
| Regression | 1         | 2598,773  | 2598,773  | 15,48086 | 0,000456923           |
| Residual   | 30        | 5036,102  | 167,8701  |          |                       |
| Total      | 31        | 7634,875  |           |          |                       |

|              | <i>Coefficients</i> | <i>Standard Error</i> | <i>t Stat</i> | <i>P-value</i> | <i>Lower 95%</i> | <i>Upper 95%</i> | <i>Lower 95,0%</i> | <i>Upper 95,0%</i> |
|--------------|---------------------|-----------------------|---------------|----------------|------------------|------------------|--------------------|--------------------|
| Intercept    | 31,71997            | 4,238575              | 7,483639      | 2,43E-08       | 23,06364045      | 40,37629         | 23,06364           | 40,37629           |
| X Variable 1 | -0,39355            | 0,100023              | -3,93457      | 0,000457       | -0,597823195     | -0,18927         | -0,59782           | -0,18927           |

**Supplementary Table S6.** Regression statistics for 22 wheat accessions, in which the expression of the *Snn1* gene and damage zones was analyzed during infection with the Sn1SP isolate.

| <i>Regression Statistics</i> |             |
|------------------------------|-------------|
| Multiple R                   | 0,923312002 |
| R Square                     | 0,852505053 |
| Adjusted R Square            | 0,845130305 |
| Standard                     | 0,169938247 |

Error

Observations 22

ANOVA

|            | <i>df</i> | <i>SS</i>   | <i>MS</i> | <i>F</i> | <i>Significance F</i> |
|------------|-----------|-------------|-----------|----------|-----------------------|
| Regression | 1         | 3,338351661 | 3,338352  | 115,5979 | 9,23E-10              |
| Residual   | 20        | 0,577580157 | 0,028879  |          |                       |
| Total      | 21        | 3,915931818 |           |          |                       |

|              | <i>Coefficients</i> | <i>Standard Error</i> | <i>t Stat</i> | <i>P-value</i> | <i>Lower 95%</i> | <i>Upper 95%</i> | <i>Lower 95,0%</i> | <i>Upper 95,0%</i> |
|--------------|---------------------|-----------------------|---------------|----------------|------------------|------------------|--------------------|--------------------|
| Intercept    | 0,025206344         | 0,053203076           | 0,473776      | 0,640791       | -0,08577         | 0,136186         | -0,08577           | 0,136186           |
| X Variable 1 | 0,014512536         | 0,001349797           | 10,75164      | 9,23E-10       | 0,011697         | 0,017328         | 0,011697           | 0,017328           |

**Supplementary Table S7.** Regression statistics for 13 wheat accessions, in which the expression of the *Tsn1* gene and damage zones was analyzed during infection with the SnB isolate.

| <i>Regression Statistics</i> |          |
|------------------------------|----------|
| Multiple R                   | 0,642054 |
| R Square                     | 0,412234 |
| Adjusted R Square            | 0,358801 |

Standard Error      0,660263

Observations            13

#### ANOVA

|            | <i>df</i> | <i>SS</i> | <i>MS</i> | <i>F</i> | <i>Significance F</i> |
|------------|-----------|-----------|-----------|----------|-----------------------|
| Regression | 1         | 3,363295  | 3,363295  | 7,714925 | 0,017982              |
| Residual   | 11        | 4,795412  | 0,435947  |          |                       |
| Total      | 12        | 8,158708  |           |          |                       |

|              | <i>Coefficients</i> | <i>Standard Error</i> | <i>t Stat</i> | <i>P-value</i> | <i>Lower 95%</i> | <i>Upper 95%</i> | <i>Lower 95,0%</i> | <i>Upper 95,0%</i> |
|--------------|---------------------|-----------------------|---------------|----------------|------------------|------------------|--------------------|--------------------|
| Intercept    | 0,233656            | 0,291567              | 0,801383      | 0,439878       | -0,40808         | 0,87539          | -0,40808           | 0,87539            |
| X Variable 1 | 0,0274              | 0,009865              | 2,777575      | 0,017982       | 0,005688         | 0,049111         | 0,005688           | 0,049111           |
